# Supplementary material for: Combined Eccentric-Isokinetic and Isoinertial Training Leads to Large Ring-Specific Strength Gains in Elite Gymnasts
Source: MDPI journal article supplement (doi:10.3390/sports10040049), 2022-03-28
Supplement: s1 [file s1]

**Table S1.** Individual results (resistance: body weight + additional weight / - counterweight; holding time) at the maximum strength tests of the elements swallow and support scale on rings before (pretest), during (Test 2 and 3) and after (posttest) the three-week eccentric training intervention.

## Maximum strength

| Swallow |                    |             |                    |             |                    |             |                    |             | Support scale      |             |                    |             |                    |             |                    |             |
|---------|--------------------|-------------|--------------------|-------------|--------------------|-------------|--------------------|-------------|--------------------|-------------|--------------------|-------------|--------------------|-------------|--------------------|-------------|
| Athlete | Pretest            |             | Test 2             |             | Test 3             |             | Posttest           |             | Pretest            |             | Test 2             |             | Test 3             |             | Posttest           |             |
|         | Resistance<br>(kg) | Time<br>(s) |
| 1       | 53.70              | 5.21        | 55.15              | 4.70        | 56.40              | 4.00        | 61.60              | 4.68        | 48.70              | 5.04        | 51.40              | 5.00        | 53.90              | 4.90        | 56.60              | 5.11        |
| 2       | 63.70              | 4.20        | 59.00              | 3.60        | 64.00              | 4.60        | 64.50              | 2.03        | 63.70              | 5.64        | 68.00              | 6.30        | 68.00              | 6.87        | 68.50              | 5.11        |
| 3       | 38.70              | 5.24        | 41.10              | 5.86        | 43.90              | 3.41        | 43.70              | 5.00        | 46.20              | 4.83        | 46.10              | 4.01        | 47.65              | 3.17        | 48.70              | 4.80        |
| 4       | 40.10              | 4.70        | 40.20              | 6.00        | 45.00              | 3.47        | 46.00              | 5.11        | 50.10              | 4.97        | 50.20              | 3.51        | 50.00              | 3.30        | 52.25              | 4.30        |
| 5       | 58.50              | 4.91        | 59.00              | 6.04        | 65.60              | 5.07        | 65.20              | 5.14        | 61.00              | 5.21        | 64.00              | 6.91        | 67.60              | 4.10        | 67.20              | 4.44        |
| 6       | 51.70              | 5.20        | 54.20              | 4.63        | 54.95              | 4.70        | 59.00              | 4.74        | 61.70              | 4.27        | 61.70              | 4.94        | 62.95              | 4.90        | 64.00              | 4.31        |
| 7       | 45.60              | 5.24        | 46.40              | 7.28        | 48.40              | 5.00        | 51.90              | 4.10        | 54.35              | 4.41        | 55.15              | 4.24        | 54.65              | 3.71        | 59.40              | 2.75        |
| 8       | 59.00              | 5.11        | 58.70              | 5.10        | 58.90              | 5.37        | 59.30              | 5.17        | 61.50              | 6.04        | 63.20              | 3.94        | 65.40              | 5.14        | 67.80              | 4.94        |
| 9       | 53.60              | 5.00        | 55.45              | 5.38        | 56.10              | 5.41        | -                  | -           | 61.10              | 4.07        | 63.70              | 4.00        | 65.10              | 5.51        | -                  | -           |
| 10      | 65.00              | 4.24        | 65.40              | 4.54        | 65.40              | 6.14        | 66.30              | 5.04        | 60.00              | 4.47        | 65.40              | 4.41        | 65.40              | 5.10        | 65.30              | 4.77        |

**Table S2.** Individual results (resistance: body weight + additional weight / - counterweight; holding time) at the strength endurance tests of the elements swallow and support scale on rings before (pretest), during (Test 2 and 3) and after (posttest) the three-week eccentric training intervention.

| Strength endurance |                    |             |                    |             |                    |             |                    |             |                    |             |                    |             |                    |             |                    |             |
|--------------------|--------------------|-------------|--------------------|-------------|--------------------|-------------|--------------------|-------------|--------------------|-------------|--------------------|-------------|--------------------|-------------|--------------------|-------------|
| Swallow            |                    |             |                    |             |                    |             |                    |             | Support scale      |             |                    |             |                    |             |                    |             |
| Athlete            | Pretest            |             | Test 2             |             | Test 3             |             | Posttest           |             | Pretest            |             | Test 2             |             | Test 3             |             | Posttest           |             |
|                    | Resistance<br>(kg) | Time<br>(s) |
| 1                  | 53.70              | 5.21        | 53.70              | 5.70        | 53.70              | 10.00       | 53.70              | 10.35       | 48.70              | 5.04        | 48.70              | 8.30        | 48.70              | 10.00       | 48.70              | 15.66       |
| 2                  | 63.70              | 4.20        | 63.70              | 0.00        | 63.70              | 4.60        | 63.70              | 2.03        | 63.70              | 5.64        | 63.70              | 11.32       | 63.70              | 13.52       | 63.70              | 10.35       |
| 3                  | 38.70              | 5.24        | 38.70              | 7.01        | 38.70              | 10.75       | 38.70              | 15.82       | 46.20              | 4.83        | 46.20              | 4.01        | 46.20              | 3.70        | 46.20              | 7.88        |
| 4                  | 40.10              | 4.70        | 40.10              | 6.00        | 40.10              | 17.20       | 40.10              | 21.93       | 50.10              | 4.97        | 50.10              | 3.51        | 50.10              | 3.30        | 50.10              | 5.40        |
| 5                  | 58.50              | 4.91        | -                  | -           | 58.50              | 9.11        | 58.50              | 10.35       | 61.00              | 5.21        | -                  | -           | 61.00              | 9.38        | 61.00              | 13.89       |
| 6                  | 51.70              | 5.20        | 51.70              | 8.64        | 51.70              | 7.15        | 51.70              | 17.56       | 61.70              | 4.27        | 61.70              | 4.94        | 61.70              | 5.50        | 61.70              | 7.91        |
| 7                  | 45.60              | 5.24        | 45.60              | 7.28        | 45.60              | 8.04        | 45.60              | 10.11       | 54.35              | 4.41        | 54.35              | 4.24        | 54.35              | 3.71        | 54.35              | 4.04        |
| 8                  | 59.00              | 5.11        | 59.00              | 5.1         | 59.00              | 5.37        | 59.00              | 5.17        | 61.50              | 6.04        | 61.50              | 7.20        | 61.50              | 14.30       | 61.50              | 15.26       |
| 9                  | 53.60              | 5.00        | 53.60              | 6.27        | 53.60              | 10.15       | -                  | -           | 61.10              | 4.07        | 61.10              | 8.15        | 61.10              | 11.85       | -                  | -           |
| 10                 | 65.00              | 4.24        | 65.00              | 4.54        | 65.00              | 6.14        | 65.00              | 4.84        | 60.00              | 4.47        | 60.00              | 9.51        | 60.00              | 7.98        | 60.00              | 4.77        |
